# Supplementary material for: Classification of Subtypes of Apert Syndrome, Based on the Type of Vault Suture Synostosis
Source: PubMed Central journal article supplement — Plast Reconstr Surg Glob Open. 2019 Mar 20;7(3):e2158. doi: 10.1097/GOX.0000000000002158 (PMC6467634; doi:10.1097/gox.0000000000002158), 2019-03-20
Supplement: gox-7-e2158-s001.pdf [file gox-7-e2158-s001.pdf]

**Supplemental Digital Content 1. Definition of landmarks**

| <b>Abbreviation</b> | <b>Variable</b>                  | <b>Definition</b>                                                                                                                       |
|---------------------|----------------------------------|-----------------------------------------------------------------------------------------------------------------------------------------|
| A                   | A Point                          | point of maximum concavity in the midline of the alveolar process of the maxilla                                                        |
| AGR/AGL             | Antegonial notch                 | the highest point of the concavity of the lower border of the ramus where it joins the body of the mandible                             |
| ANS                 | Anterior nasal spine             | the tip of the median, sharp bony process of the maxilla at the lower margin of the anterior nasal opening                              |
| ARR/ARL             | Articulare                       | the most posterior point of the mandibular condyle                                                                                      |
| B                   | B Point                          | point of maximum concavity in the midline of the alveolar process of the mandible                                                       |
| BA                  | Basion                           | most inferior and posterior point on the most anterior margin of the foramen magnum                                                     |
| COR/COL             | Condylion                        | most posterosuperior point of each mandibular condyle in the sagittal plane                                                             |
| Corneae R/L         | Corneae                          | the most anterior point of cornea                                                                                                       |
| ES                  | Ethmo-sphenoid                   | most superior point of the suture between ethmoid and sphenoid at the midline                                                           |
| FZR/FZL             | Frontozygomatic Point            | the most medial and anterior point of each frontozygomatic suture at the level of the lateral orbital rim                               |
| Gn                  | Gnathion                         | halfway between pogonion and menton on the symphysis, it is the most anterior/inferior point of the symphysis of the mandible           |
| GOR/GOL             | Gonion                           | point on the mandibular angle representing the intersection of the lines of the posterior ramus and the inferior border of the mandible |
| JR/JL               | J point                          | the deepest point in the concavity of the maxilla on both sides                                                                         |
| Men                 | Menton                           | most inferior midpoint of the chin on the outline of the mandibular symphysis                                                           |
| N                   | Nasion                           | Junction of the frontonasal suture at the most posterior point on the curve at the bridge of the nose                                   |
| NcR/L               | Nasal cavity point               | nasal cavity widest points                                                                                                              |
| OFR/OFL             | Optic foramen point              | the midpoint of the rim of optic foramen                                                                                                |
| OP                  | Opisthion                        | posterior midsagittal point on the posterior margin of foramen magnum                                                                   |
| ORR/L               | Orbitale                         | most inferior point of each infraorbital rim                                                                                            |
| PNS                 | Posterior Nasal Spine            | most posterior midpoint of the posterior nasal spine of the palatine bone.                                                              |
| PoR/L               | Porion                           | most superior point of each external acoustic meatus                                                                                    |
| Pog                 | Pogonion                         | most anterior midpoint of the chin on the outline of the mandibular symphysis                                                           |
| PPmR/mL             | Medial pterygoid plate           | most anterior point of the medial pterygoid plate at the pterygomaxillary fissure                                                       |
| PPR/L               | lateral pterygoid plate          | most lateral point of the most inferior portion of lateral pterygoid plate                                                              |
| Ro                  | Rhinion                          | the anterior tip at the end of the suture of the nasal bones                                                                            |
| S                   | Sella                            | center of the hypophyseal fossa                                                                                                         |
| SO                  | Spheno-occipital Synchronosis    | most anterior point on the midline of the occipital bone at the spheno-occipital synchronosis                                           |
| UORR/L              | orbital uppermost point          | uppermost points on the roof of the orbit                                                                                               |
| ZMR/L               | Zygomaticomaxillary suture point | point at the zygomaticomaxillary suture on the anterior margin of the inferior orbital rim on each side                                 |

ZPR/L

Zygoma peak point

the farrest point to the zygomatic self-base plane. The self-base plane was produced by the 3 midpoints of the 3 sutures around zygoma, the zygomaticomaxillary suture, zygomaticotemporal suture and zygomaticofrontal suture.

---
