# Supplementary material for: Classification of Subtypes of Apert Syndrome, Based on the Type of Vault Suture Synostosis
Source: PubMed Central journal article supplement — Plast Reconstr Surg Glob Open. 2019 Mar 20;7(3):e2158. doi: 10.1097/GOX.0000000000002158 (PMC6467634; doi:10.1097/gox.0000000000002158), 2019-03-20
Supplement: gox-7-e2158-s002.pdf [file gox-7-e2158-s002.pdf]

## Supplemental Digital Content 2. Definition of cephalometric distances, angles, ratios and planes

| Variable                                         | Abbreviation | Definition                                                                                                                                        |
|--------------------------------------------------|--------------|---------------------------------------------------------------------------------------------------------------------------------------------------|
| <b>Cranial base</b>                              |              |                                                                                                                                                   |
| <b>Inner linear measurements</b>                 |              |                                                                                                                                                   |
| anterior cranial fossa base width                | ACF          | the minimum interorbital distance measured at the posterior globe of coronal slides                                                               |
| Nasion-Basion                                    | N-BA         | the distance between Nasion and Basion, indicates the cranial base length                                                                         |
| Sella-Basion                                     | S-BA         | the distance between Sella and Basion, indicates the posterior cranial base length, clivus length                                                 |
| Sella to Spheno-occipital Synchondrosis          | S-SO         | the distance between Sella and Spheno-occipital Synchondrosis, related to cranial base length, clivus height                                      |
| Spheno-occipital Synchondrosis to Basion         | SO-BA        | the distance between Spheno-occipital Synchondrosis and Basion, indicates the length of basilar part of occipital bone in the midsagittal plane   |
| Basion-Opisthion                                 | BA-OP        | the distance between Basion and Opisthion, indicates the anteroposterior length of foramen magnum                                                 |
| Spheno-occipital Synchondrosis to Ethmo-sphenoid | SO-ES        | the distance between Spheno-occipital Synchondrosis and Ethmo-sphenoid, indicated the anteroposterior length of sphenoid in the midsagittal plane |
| Sella to Ethmo-sphenoid                          | S-ES         | the distance between sella and ethmo-sphenoid, related to sphenoid endocranial length in sagittal plane                                           |
| Sella-Nasion                                     | S-N          | the distance between point Sella and Nasion, indicates the anterior cranial base length                                                           |
| Nasion to ethmoid-sphenoid                       | N-ES         | the distance between Nasion and ethmoid-sphenoid, indicates the ethmoid length in anterior cranial fossa                                          |
| <b>Angular measurements</b>                      |              |                                                                                                                                                   |
| Sphenoid greater wing divergence                 |              | measured from the plane pass the midpoint of bilateral most infront points of corneas and parallel to Frankfort horizontal plane                  |
| Separation of lateral pterygoid                  | PPR-S-PPL    | the angle between bilateral lateral pterygoid plates, measured by connecting points PPR, S and PPL                                                |
| Nasion-Sella-[Spheno-occipital Synchondrosis]    | N-S-SO       | indicates the middle and anterior cranial base angle                                                                                              |
| Sella-[Spheno-occipital Synchondrosis]-basion    | S-SO-BA      | indicates the posterior cranial base angle                                                                                                        |
| Sphenoid Angle                                   | BA-S-ES      | corresponding to the degree of backward rotation of the sphenoid, indicates the posterior and middle cranial base angle                           |
| Nasion-Sella-Basion                              | N-S-BA       | indicates the cranial base angle in brain side                                                                                                    |
| Nasion-[Spheno-occipital Synchondrosis]-Basion   | N-SO-BA      | indicates the cranial base angle in facial side                                                                                                   |
| <b>External linear measurements</b>              |              |                                                                                                                                                   |

|                                           |        |                                                                                                                                                                           |
|-------------------------------------------|--------|---------------------------------------------------------------------------------------------------------------------------------------------------------------------------|
| Basion-Posterior nasal spine              | BA-PNS | the distance between basion and posterior nasal spine, related to the distance of posterior cranial base to posterior nasal spine, the anteroposterior diameter of airway |
| Nasion-Posterior nasal spine              | S-PNS  | the distance between nasion and posterior nasal spine, related to the distance of middle cranial base to posterior nasal spine                                            |
| Ethmoid-sphenoid to Posterior nasal spine | ES-PNS | the distance between the suture of ethmoid-sphenoid and posterior nasal spine, related to the distance of anterior cranial base to posterior nasal spine                  |
| Nasion-Posterior nasal spine              | N-PNS  | the distance between nasion and posterior nasal spine                                                                                                                     |
| Basion-Anterior nasal spine               | BA-ANS | the distance between basion and anterior nasal spine, indicates midfacial length                                                                                          |
| Sella-Articulare                          | S-AR   | the distance between sella and articulare, related to the height of cranial base                                                                                          |

### **Craniofacial relationship**

#### **linear measurements**

|                                                                |               |                                                                                                                                                                                                          |
|----------------------------------------------------------------|---------------|----------------------------------------------------------------------------------------------------------------------------------------------------------------------------------------------------------|
| Sella-Nasion                                                   | S-N           | the anterior cranial base length                                                                                                                                                                         |
| Sella-Anterior nasal spine                                     | S-ANS         | the distance between sella and anterior nasal spine                                                                                                                                                      |
| Sella-A point                                                  | S-A           | the distance between sella and A point                                                                                                                                                                   |
| Sella-B point                                                  | S-B           | the distance between sella and B point                                                                                                                                                                   |
| Sella-Pogonion                                                 | S-Pog         | posterior facial height                                                                                                                                                                                  |
| Y Axis                                                         | S-GN          | the distance between sella and Gnathion                                                                                                                                                                  |
| Nasion-Posterior nasal spine                                   | S-PNS         | the distance between nasion and posterior nasal spine                                                                                                                                                    |
| Sella-Gonion                                                   | S-GO          | the posterior total facial height right                                                                                                                                                                  |
| Sella-Articulare                                               | S-AR          | the distance between sella and articulare                                                                                                                                                                |
| Anterior nasal spine-Basion                                    | ANS-BA        | midfacial length                                                                                                                                                                                         |
| Anterior nasal spine-Nasion                                    | ANS-N         | the anterior midfacial height                                                                                                                                                                            |
| Anterior nasal spine-Menton                                    | ANS-Men       | anterior lower facial height                                                                                                                                                                             |
| Nasion-Menton                                                  | N-Men         | anterior total facial height                                                                                                                                                                             |
| upper anterior facial height-<br>upper posterior facial height | N-ANS/S-PNS   | indicates ratio of upper anterior facial height to upper posterior facial height                                                                                                                         |
| Lower facial height/Total facial<br>height                     | ANS-Men/N-Men | Indicates ratio of lower to total facial heights                                                                                                                                                         |
| Posterior facial height-Anterior<br>facial height              | S-GO/N-Men    | indicates ratio of posterior and anterior facial heights                                                                                                                                                 |
| Modified 3-D Wit's<br>measurement                              | Wit's         | The modified 3-D Wit's measurement is a projective linear measurement between the 3-D cephalometric hard tissue A point and B point landmarks that are projected perpendicular on the 3-D occlusal plane |

#### **Angular measurements**

|                      |     |                                                                              |
|----------------------|-----|------------------------------------------------------------------------------|
| Sella-Nasion-A point | SNA | indicates the sagittal position of the maxilla relative to the cranial base. |
|----------------------|-----|------------------------------------------------------------------------------|

|                                     |         |                                                                               |
|-------------------------------------|---------|-------------------------------------------------------------------------------|
| Sella-Nasion-B point                | SNB     | indicates the sagittal position of the mandible relative to the cranial base. |
| A point-Nasion-B point              | ANB     | the relative position of the maxilla to the mandible                          |
| Nasion-Sella-Articulare             | N-S-AR  | corresponding to cranial base angle                                           |
| Nasion-Sella-medial pterygoid plate | N-S-PP  | corresponding to the degree of backward rotation of the pterygoid plates      |
| Nasion-Sella-Gnathion               | N-S-GN  | the relative position of gnathion to cranial base                             |
| Nasion-A point-Pogonion             | N-A-Pog | indicates facial convexity angle                                              |
| Sella-Nasion-Pogonion               | S-N-Pog | indicates the sagittal position of the chin to anterior cranial base          |

### Planes

|                            |     |                                                                                                                                                                                                                                         |
|----------------------------|-----|-----------------------------------------------------------------------------------------------------------------------------------------------------------------------------------------------------------------------------------------|
| Sella-Nasion plane         | SN  | The plane passing through sella and nasion landmarks and perpendicular to midsagittal plane                                                                                                                                             |
| Frankfort horizontal Plane | FH  | The Frankfort horizontal plane is defined by a plane that passes the midpoint of both Orbita (Orbital and Orbital) landmarks and the midpoint of the two Porion (Porionr and Porionl) landmarks, and perpendicular to midsagittal plane |
| Maxillary plane            | Mx  | The maxillary plane is defined by a plane that passes the anterior nasal spine and posterior nasal spine landmarks, and perpendicular to midsagittal plane                                                                              |
| Occlusal plane             | Occ | The occlusal plane is defined by a plane that passes the mean of upper and lower Incisor landmarks in both sides and the mean of upper and lower molar landmarks in both side, and perpendicular to midsagittal plane                   |
| Mandibular plane           | MP  | The mandibular plane is defined by a plane that passes the menton and the mean of both Gonion landmarks, and perpendicular to midsagittal plane                                                                                         |
| Mandible ramus plane       | MRP | The plane passes the mean of bilateral gonions and the mean of bilateral condylions, and is perpendicular to midsagittal plane                                                                                                          |

### Orbit

#### Unilateral orbital feature

|                       |  |                                                                                                                                                                                                                                                        |
|-----------------------|--|--------------------------------------------------------------------------------------------------------------------------------------------------------------------------------------------------------------------------------------------------------|
| orbit length          |  | the distance from the zygomaticomaxillary suture on the orbital rim to the optic foramen                                                                                                                                                               |
| orbit height          |  | the distance between the midsuperior and midinferior orbital rim on a sagittal plane crossing the apex corneae                                                                                                                                         |
| orbit width           |  | the distance between the most anterior portion of the medial and the lateral orbital walls on an axial plane crossing the apex corneae.                                                                                                                |
| vertical cone angle   |  | Angulation of the vertical walls of the posterior orbit as defined by three points: the superior most point of the orbital roof, vertex at the optic foramen, and inferior point on the orbital floor in the same sagittal slice as the superior point |
| horizontal cone angle |  | the angle was measured on the slide pass the midpoint of bilateral corneae and parallel to FH plane, vertex at the optic forament, the others two points were the anterior most point of lateral orbital wall and the medial point of ethmoid bone     |
| orbit rim angle       |  | angle of orbital rim plane to middle sagittal plane. The orbital rim plane defined by points on the orbital rim: supraorbital notch, zygomaticofrontal suture and zygomaticomaxillary suture                                                           |
| Globe Projection      |  | the distance from the most anterior point of cornea to the orbital rim plane                                                                                                                                                                           |
| visual axis length    |  | the distance between corneae and optic foramen                                                                                                                                                                                                         |



|                                                |                                 |                                                                          |
|------------------------------------------------|---------------------------------|--------------------------------------------------------------------------|
| Condylion-Gonion/Gonion-Pogonion               | CO-GO/GO-Pog                    | the ratio of mandibular ramus height to mandibular body effective length |
| <b>Angular measurements</b>                    |                                 |                                                                          |
| Condylion-Gonion-Menton                        | COR/L-GOR/L-Men                 | the gonial angle                                                         |
| Articulare-Gonion-Mention                      | ARR/L-GOR/L-Men                 | the gonial angle                                                         |
| Articulare-Gonion-Nasion                       | ARR/L-GOR/L-N                   | the upper gonial angle                                                   |
| Nasion-Gonion-Menton                           | N-GOR/L-Men                     | the lower gonial angle                                                   |
| Right-Left [Condylion-Antegonial notch-Menton] | [CoR-AGR-Men]-<br>[CoL-AGL-Men] | the angle between bilateral mandibular planes                            |

---
