# Supplementary material for: Classification of Subtypes of Apert Syndrome, Based on the Type of Vault Suture Synostosis
Source: PubMed Central journal article supplement — Plast Reconstr Surg Glob Open. 2019 Mar 20;7(3):e2158. doi: 10.1097/GOX.0000000000002158 (PMC6467634; doi:10.1097/gox.0000000000002158), 2019-03-20

### control

- ①-OF-②: outside horizontal angle
- ①-OF-③: ethmoid side angle
- ②-OF-④: sphenoid side angle
- ③-OF-④: inside horizontal angle

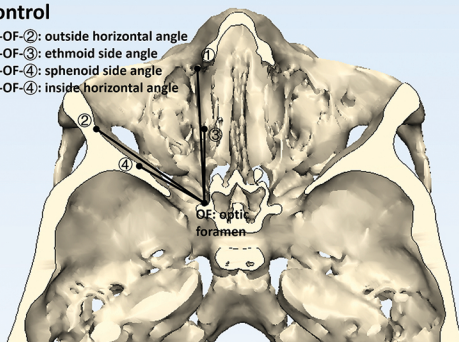

### Class I. Bilateral coronal synostosis

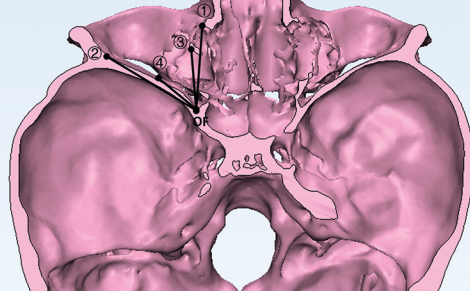

### Class II. Pansynostosis

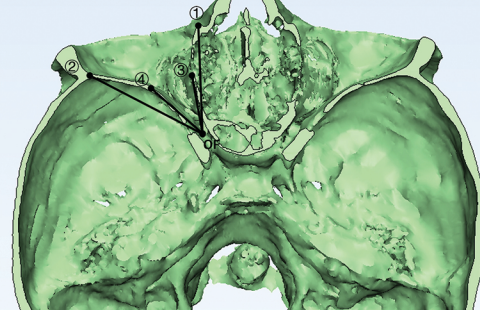

### Class III-a. Unilateral coronal + metopic synostosis

Left coronal synostosis

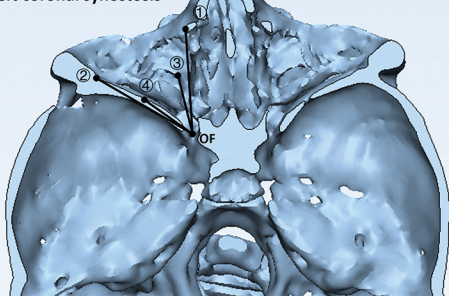

### Class III-b. Sagittal + lambdoidal synostosis

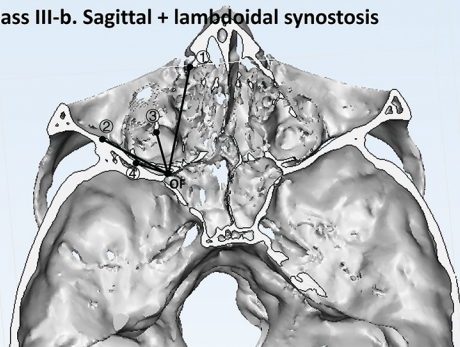

### Class III-c. Others

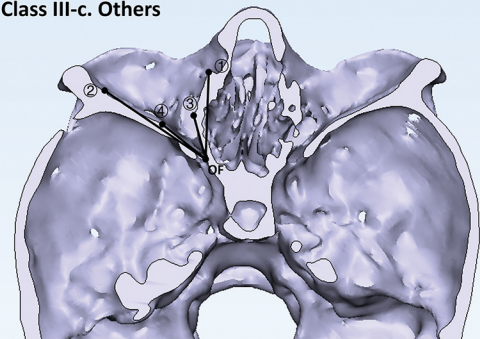

Supplement: gox-7-e2158-s004.pdf [file gox-7-e2158-s004.pdf]
