# Supplementary material for: Classification of Subtypes of Apert Syndrome, Based on the Type of Vault Suture Synostosis
Source: PubMed Central journal article supplement — Plast Reconstr Surg Glob Open. 2019 Mar 20;7(3):e2158. doi: 10.1097/GOX.0000000000002158 (PMC6467634; doi:10.1097/gox.0000000000002158), 2019-03-20
Supplement: gox-7-e2158-s005.pdf [file gox-7-e2158-s005.pdf]

Supplemental Digital Content 5. The complete set of all measurements results of each subtype

| Index                                      | Class I   |       |         |       |           |               |       |         |       |           |                    |       |         |      |           |                     |      |         |      |           |        |         | Class II |  |  | Class III a |  |  | Class III b |  |  | Class III c |  | D-value |
|--------------------------------------------|-----------|-------|---------|-------|-----------|---------------|-------|---------|-------|-----------|--------------------|-------|---------|------|-----------|---------------------|------|---------|------|-----------|--------|---------|----------|--|--|-------------|--|--|-------------|--|--|-------------|--|---------|
|                                            | bicoronal |       | control |       | Rank Test | pansynostosis |       | control |       | Rank Test | unicoronal+metopic |       | control |      | Rank Test | sagittal+lambdoidal |      | control |      | Rank Test | others | control |          |  |  |             |  |  |             |  |  |             |  |         |
|                                            | AVE       | STD   | AVE     | STD   | p         | AVE           | STD   | AVE     | STD   | p         | AVE                | STD   | AVE     | STD  | p         | AVE                 | STD  | AVE     | STD  | p         | AVE    | AVE     |          |  |  |             |  |  |             |  |  |             |  |         |
| <b>Cranial base</b>                        |           |       |         |       |           |               |       |         |       |           |                    |       |         |      |           |                     |      |         |      |           |        |         |          |  |  |             |  |  |             |  |  |             |  |         |
| <b>Inner linear measurements</b>           |           |       |         |       |           |               |       |         |       |           |                    |       |         |      |           |                     |      |         |      |           |        |         |          |  |  |             |  |  |             |  |  |             |  |         |
| ACF                                        | 19.97     | 6.29  | 11.58   | 2.71  | <0.001**  | 26.72         | 4.31  | 16.91   | 4.30  | <0.001**  | 25.05              | 6.24  | 12.90   | 3.49 | 0.010*    | 33.45               | 3.82 | 18.73   | 4.19 | 0.005**   | 23.77  | 10.15   | 13.62    |  |  |             |  |  |             |  |  |             |  |         |
| N-BA                                       | 64.73     | 10.99 | 73.58   | 10.49 | 0.012*    | 82.44         | 6.76  | 93.13   | 11.07 | 0.053     | 76.60              | 8.05  | 84.81   | 5.90 | 0.203     | 87.82               | 1.42 | 98.24   | 7.47 | 0.005**   | 71.68  | 80.70   | -9.01    |  |  |             |  |  |             |  |  |             |  |         |
| N-S                                        | 43.16     | 7.81  | 49.37   | 7.54  | 0.012*    | 56.72         | 4.00  | 61.57   | 8.60  | 0.385     | 54.59              | 5.31  | 57.63   | 4.17 | 0.498     | 63.64               | 1.61 | 65.60   | 3.08 | 0.291     | 48.30  | 54.70   | -6.40    |  |  |             |  |  |             |  |  |             |  |         |
| N-ES                                       | 28.62     | 4.36  | 32.17   | 4.79  | 0.022*    | 38.29         | 4.19  | 39.96   | 5.08  | 0.682     | 36.66              | 7.17  | 36.91   | 2.66 | 0.426     | 36.80               | 0.68 | 41.93   | 3.64 | 0.060     | 32.48  | 36.58   | -4.10    |  |  |             |  |  |             |  |  |             |  |         |
| S-BA                                       | 26.79     | 3.99  | 30.89   | 4.47  | 0.005**   | 31.65         | 4.54  | 40.63   | 5.93  | 0.013*    | 31.44              | 4.66  | 35.62   | 2.27 | 0.039*    | 37.51               | 0.98 | 43.06   | 5.72 | 0.060     | 31.07  | 34.57   | -3.50    |  |  |             |  |  |             |  |  |             |  |         |
| S-SO                                       | 12.71     | 3.43  | 15.98   | 3.58  | 0.005**   | 15.47         | 1.81  | 22.00   | 5.08  | 0.002**   | 16.29              | 2.56  | 19.56   | 1.94 | 0.039*    | 21.08               | 1.39 | 23.19   | 1.49 | 0.060     | 15.57  | 18.19   | -2.63    |  |  |             |  |  |             |  |  |             |  |         |
| SO-BA                                      | 17.10     | 2.13  | 18.30   | 1.95  | 0.070     | 17.31         | 2.10  | 22.92   | 3.34  | 0.001**   | 19.87              | 3.13  | 19.97   | 1.85 | 0.912     | 22.31               | 2.67 | 24.56   | 4.77 | 0.769     | 18.96  | 19.32   | -0.36    |  |  |             |  |  |             |  |  |             |  |         |
| BA-OP                                      | 28.88     | 4.65  | 30.05   | 4.10  | 0.360     | 35.38         | 3.67  | 33.17   | 2.89  | 0.388     | 30.17              | 1.61  | 33.19   | 3.02 | 0.121     | 38.60               | 0.90 | 35.88   | 0.90 | 0.012*    | 35.47  | 31.66   | 3.81     |  |  |             |  |  |             |  |  |             |  |         |
| SO-ES                                      | 22.55     | 4.99  | 26.80   | 5.31  | 0.010*    | 28.76         | 3.53  | 34.83   | 6.37  | 0.083     | 25.56              | 0.20  | 31.71   | 3.03 | 0.002**   | 32.99               | 2.66 | 36.15   | 2.19 | 0.126     | 24.29  | 28.50   | -4.21    |  |  |             |  |  |             |  |  |             |  |         |
| S-ES                                       | 15.16     | 3.80  | 17.61   | 4.01  | 0.028*    | 18.57         | 1.93  | 22.59   | 4.57  | 0.032*    | 18.06              | 1.93  | 21.48   | 2.64 | 0.056     | 29.93               | 5.80 | 23.61   | 2.05 | 0.060     | 15.96  | 18.21   | -2.26    |  |  |             |  |  |             |  |  |             |  |         |
| <b>Inner angular measurements</b>          |           |       |         |       |           |               |       |         |       |           |                    |       |         |      |           |                     |      |         |      |           |        |         |          |  |  |             |  |  |             |  |  |             |  |         |
| greater wing                               | 108.98    | 10.84 | 95.81   | 10.34 | 0.001**   | 118.04        | 7.58  | 89.79   | 6.22  | <0.001**  | 107.51             | 5.10  | 90.77   | 6.93 | 0.002**   | 102.52              | 7.25 | 88.86   | 5.26 | 0.011*    | 106.58 | 92.82   | 13.76    |  |  |             |  |  |             |  |  |             |  |         |
| PPR-S-PPL                                  | 66.65     | 6.76  | 66.83   | 6.19  | 0.594     | 72.79         | 6.12  | 66.63   | 4.55  | 0.083*    | 67.26              | 6.62  | 62.86   | 4.41 | 0.250     | 72.67               | 1.04 | 62.02   | 4.79 | 0.005**   | 70.97  | 62.57   | 8.41     |  |  |             |  |  |             |  |  |             |  |         |
| N-S-BA                                     | 134.58    | 10.14 | 131.85  | 5.68  | 0.201     | 140.87        | 6.99  | 128.72  | 4.63  | 0.001**   | 123.73             | 2.40  | 128.11  | 4.78 | 0.130     | 118.27              | 5.09 | 129.06  | 4.64 | 0.005**   | 127.75 | 127.96  | -0.22    |  |  |             |  |  |             |  |  |             |  |         |
| N-S-SO                                     | 106.01    | 10.49 | 103.86  | 7.24  | 0.566     | 117.98        | 14.94 | 103.42  | 5.38  | 0.032*    | 91.00              | 3.63  | 102.29  | 5.89 | 0.017*    | 87.11               | 1.03 | 103.21  | 5.21 | 0.005**   | 99.98  | 104.32  | -4.34    |  |  |             |  |  |             |  |  |             |  |         |
| N-SO-BA                                    | 166.98    | 15.09 | 171.46  | 4.17  | 0.645     | 172.26        | 4.62  | 170.21  | 6.87  | 0.616     | 166.01             | 1.27  | 170.31  | 6.64 | 0.250     | 165.76              | 2.94 | 170.99  | 6.98 | 0.368     | 165.90 | 166.51  | -0.61    |  |  |             |  |  |             |  |  |             |  |         |
| S-SO-BA                                    | 130.42    | 11.86 | 127.95  | 6.65  | 0.878     | 136.82        | 13.65 | 130.39  | 8.79  | 0.750     | 120.76             | 3.44  | 128.54  | 7.62 | 0.100     | 119.58              | 2.43 | 129.00  | 7.84 | 0.060     | 128.92 | 134.25  | -5.33    |  |  |             |  |  |             |  |  |             |  |         |
| BA-S-ES                                    | 138.99    | 12.66 | 134.97  | 8.76  | 0.282     | 139.03        | 9.39  | 127.76  | 6.84  | 0.024*    | 128.27             | 1.26  | 127.09  | 6.93 | 0.824     | 116.82              | 3.10 | 126.87  | 4.97 | 0.011*    | 128.10 | 127.02  | 1.08     |  |  |             |  |  |             |  |  |             |  |         |
| <b>External linear measurements</b>        |           |       |         |       |           |               |       |         |       |           |                    |       |         |      |           |                     |      |         |      |           |        |         |          |  |  |             |  |  |             |  |  |             |  |         |
| N-PNS                                      | 34.35     | 9.84  | 44.45   | 8.42  | 0.001**   | 58.78         | 8.58  | 61.06   | 9.91  | 0.820     | 49.93              | 7.17  | 53.12   | 5.42 | 0.654     | 50.97               | 2.17 | 65.49   | 6.27 | 0.005**   | 48.44  | 49.43   | -0.98    |  |  |             |  |  |             |  |  |             |  |         |
| BA-PNS                                     | 34.75     | 9.05  | 34.27   | 4.13  | 0.881     | 31.18         | 5.83  | 40.92   | 4.66  | 0.003**   | 29.20              | 0.68  | 38.57   | 2.96 | 0.002**   | 41.58               | 2.49 | 41.42   | 3.20 | 0.885     | 24.52  | 37.09   | -12.58   |  |  |             |  |  |             |  |  |             |  |         |
| ES-PNS                                     | 20.91     | 5.93  | 27.16   | 5.44  | 0.006**   | 31.17         | 6.81  | 39.40   | 9.74  | 0.102*    | 28.09              | 3.85  | 32.35   | 4.06 | 0.130     | 31.11               | 2.50 | 40.72   | 5.41 | 0.022     | 25.19  | 30.16   | -4.97    |  |  |             |  |  |             |  |  |             |  |         |
| S-PNS                                      | 24.94     | 5.50  | 29.59   | 6.11  | 0.088     | 29.33         | 5.94  | 41.58   | 8.21  | 0.007**   | 28.36              | 2.57  | 36.16   | 3.90 | 0.002**   | 39.47               | 2.93 | 42.61   | 4.59 | 0.225     | 22.88  | 34.27   | -11.39   |  |  |             |  |  |             |  |  |             |  |         |
| S-ANS                                      | 46.31     | 8.41  | 57.86   | 9.01  | <0.001**  | 59.95         | 6.96  | 75.28   | 11.44 | 0.003**   | 59.04              | 5.64  | 67.61   | 6.03 | 0.056     | 65.93               | 1.31 | 79.30   | 5.77 | 0.005**   | 48.92  | 63.84   | -14.93   |  |  |             |  |  |             |  |  |             |  |         |
| BA-ANS                                     | 57.32     | 9.75  | 70.34   | 8.88  | <0.001**  | 72.57         | 9.07  | 87.89   | 11.30 | 0.013*    | 65.56              | 5.66  | 79.84   | 5.75 | 0.002**   | 72.04               | 3.61 | 92.59   | 7.63 | 0.005**   | 59.09  | 76.30   | -17.22   |  |  |             |  |  |             |  |  |             |  |         |
| S-ARR/L                                    | 35.72     | 6.92  | 40.68   | 5.23  | 0.015*    | 44.89         | 6.27  | 48.84   | 4.78  | 0.213     | 42.08              | 3.92  | 45.51   | 3.83 | 0.250     | 49.69               | 4.47 | 52.04   | 4.16 | 0.368     | 40.28  | 42.99   | -2.71    |  |  |             |  |  |             |  |  |             |  |         |
| <b>Craniofacial relationship</b>           |           |       |         |       |           |               |       |         |       |           |                    |       |         |      |           |                     |      |         |      |           |        |         |          |  |  |             |  |  |             |  |  |             |  |         |
| <b>Based on Sella-Nasion plane</b>         |           |       |         |       |           |               |       |         |       |           |                    |       |         |      |           |                     |      |         |      |           |        |         |          |  |  |             |  |  |             |  |  |             |  |         |
| SN/FH                                      | 6.53      | 7.55  | 4.87    | 2.81  | 0.013     | 16.22         | 3.87  | 8.01    | 3.90  | 0.001**   | 6.81               | 1.90  | 5.71    | 3.21 | 0.574     | 3.77                | 2.12 | 7.73    | 2.93 | 0.022*    | 12.58  | 3.78    | 8.80     |  |  |             |  |  |             |  |  |             |  |         |
| SN/Mx                                      | 14.71     | 5.89  | 5.61    | 4.28  | <0.001**  | 14.81         | 7.06  | 6.75    | 3.10  | 0.003**   | 14.89              | 2.32  | 5.05    | 3.60 | 0.002**   | 11.09               | 5.56 | 6.00    | 2.84 | 0.225     | 9.51   | 3.58    | 5.93     |  |  |             |  |  |             |  |  |             |  |         |
| SN/Occ                                     | 16.30     | 5.03  | 15.26   | 5.87  | 0.661     | 20.38         | 2.31  | 18.04   | 5.70  | 0.553     | 24.91              | 5.03  | 15.57   | 6.52 | 0.056     | 16.20               | 4.40 | 12.93   | 4.87 | 0.368     | 10.28  | 16.82   | -6.54    |  |  |             |  |  |             |  |  |             |  |         |
| SN/MP                                      | 31.96     | 7.53  | 29.50   | 6.41  | 0.300     | 53.66         | 3.77  | 34.34   | 4.93  | <0.001**  | 49.38              | 5.32  | 32.76   | 4.59 | 0.005**   | 40.13               | 9.26 | 32.44   | 5.57 | 0.225     | 42.56  | 30.07   | 12.49    |  |  |             |  |  |             |  |  |             |  |         |
| SN/MRP                                     | 78.93     | 12.44 | 72.86   | 6.70  | 0.040*    | 98.76         | 3.55  | 85.79   | 8.15  | 0.002**   | 87.49              | 9.13  | 78.58   | 6.19 | 0.164     | 86.15               | 1.83 | 81.20   | 5.46 | 0.170     | 80.11  | 77.86   | 2.25     |  |  |             |  |  |             |  |  |             |  |         |
| <b>Based on Frankfort horizontal plane</b> |           |       |         |       |           |               |       |         |       |           |                    |       |         |      |           |                     |      |         |      |           |        |         |          |  |  |             |  |  |             |  |  |             |  |         |
| FH-Mx                                      | 8.18      | 10.84 | 0.74    | 4.44  | 0.008**   | -0.18         | 7.39  | -1.26   | 2.85  | 0.553     | 8.08               | 1.30  | -0.67   | 3.78 | 0.002**   | 7.34                | 7.21 | -1.72   | 3.20 | 0.038*    | -3.07  | -0.20   | -2.86    |  |  |             |  |  |             |  |  |             |  |         |
| FH/Occ                                     | 9.76      | 6.17  | 9.64    | 6.08  | 0.813     | 4.16          | 5.17  | 10.03   | 5.48  | 0.041     | 18.10              | 6.41  | 9.86    | 6.31 | 0.100     | 12.43               | 3.05 | 5.20    | 3.37 | 0.005**   | -2.30  | 13.04   | -15.34   |  |  |             |  |  |             |  |  |             |  |         |
| FH/MP                                      | 26.09     | 5.88  | 24.27   | 5.48  | 0.503     | 36.25         | 4.77  | 27.52   | 5.43  | 0.006**   | 42.57              | 7.20  | 28.15   | 4.68 | 0.010*    | 36.79               | 6.39 | 24.71   | 4.12 | 0.022*    | 29.99  | 26.29   | 3.69     |  |  |             |  |  |             |  |  |             |  |         |
| FH/MRP                                     | 72.39     | 8.26  | 67.73   | 5.41  | 0.069     | 81.35         | 2.30  | 77.71   | 6.01  | 0.279     | 80.68              | 11.01 | 72.96   | 4.81 | 0.250     | 82.82               | 3.08 | 73.97   | 4.42 | 0.011*    | 67.54  | 74.08   | -6.54    |  |  |             |  |  |             |  |  |             |  |         |
| <b>Angles of two adjacent planes</b>       |           |       |         |       |           |               |       |         |       |           |                    |       |         |      |           |                     |      |         |      |           |        |         |          |  |  |             |  |  |             |  |  |             |  |         |
| Mx/Occ                                     | 0.99      | 8.37  | 8.97    | 6.25  | 0.004**   | 5.58          | 6.03  | 11.87   | 4.51  | 0.041     | 10.21              | 5.57  | 10.64   | 6.29 | 1.000     | 5.11                | 9.95 | 6.99    | 5.21 | 0.769     | 0.22   | 13.24   | -13.02   |  |  |             |  |  |             |  |  |             |  |         |
| Occ/MP                                     | 15.78     | 8.18  | 13.59   | 7.67  | 0.512     | 33.37         | 4.21  | 16.32   | 3.23  | <0.001**  | 24.63              | 3.78  | 17.23   | 5.60 | 0.076     | 23.93               | 6.82 | 19.57   | 4.93 | 0.368     | 32.39  | 13.25   | 19.14    |  |  |             |  |  |             |  |  |             |  |         |
| MP-MRP                                     | 45.76     | 6.46  | 43.44   | 6.23  | 0.265     | 45.10         | 6.64  | 51.45   | 6.60  | 0.130     | 38.11              | 3.82  | 45.82   | 5.82 | 0.100     | 46.03               | 8.88 | 48.76   | 3.98 | 0.456     | 37.55  | 47.79   | -10.24   |  |  |             |  |  |             |  |  |             |  |         |
| <b>Angular measurements</b>                |           |       |         |       |           |               |       |         |       |           |                    |       |         |      |           |                     |      |         |      |           |        |         |          |  |  |             |  |  |             |  |  |             |  |         |

|                                                    |        |       |        |       |          |        |       |        |       |          |        |       |        |       |         |        |       |        |        |         |        |        |        |
|----------------------------------------------------|--------|-------|--------|-------|----------|--------|-------|--------|-------|----------|--------|-------|--------|-------|---------|--------|-------|--------|--------|---------|--------|--------|--------|
| SNA                                                | 77.90  | 9.21  | 85.98  | 3.86  | 0.002**  | 67.00  | 4.24  | 84.86  | 5.41  | <0.001** | 72.68  | 1.80  | 83.79  | 3.85  | 0.002** | 69.65  | 2.49  | 84.80  | 3.49   | 0.005** | 66.19  | 85.01  | -18.82 |
| SNB                                                | 78.72  | 8.28  | 80.00  | 4.64  | 0.537    | 72.98  | 4.23  | 80.98  | 7.30  | 0.019*   | 73.96  | 0.40  | 78.85  | 4.52  | 0.203   | 78.23  | 2.46  | 82.04  | 3.63   | 0.126   | 81.34  | 78.81  | 2.53   |
| ANB                                                | 0.11   | 8.74  | 5.49   | 3.68  | 0.025*   | -1.37  | 9.33  | 4.11   | 1.99  | 0.289    | -1.43  | 2.45  | 4.88   | 1.78  | 0.002** | -8.63  | 4.98  | 3.40   | 1.42   | 0.005** | -15.22 | 5.60   | -20.82 |
| N-S-AR                                             | 101.25 | 6.45  | 104.42 | 2.97  | 0.088    | 109.26 | 0.96  | 108.50 | 2.24  | 0.494    | 105.51 | 2.24  | 106.18 | 2.31  | 0.738   | 103.81 | 1.47  | 108.59 | 5.12   | 0.060   | 106.25 | 107.00 | -0.75  |
| N-S-PP                                             | 73.13  | 7.46  | 75.89  | 3.98  | 0.092    | 86.96  | 5.58  | 78.17  | 3.48  | 0.003**  | 76.46  | 2.77  | 75.51  | 4.27  | 0.738   | 76.97  | 1.38  | 79.58  | 5.64   | 0.555   | 83.51  | 76.14  | 7.37   |
| N-A-Pog                                            | 174.71 | 17.77 | 166.44 | 9.35  | 0.212    | 191.98 | 6.27  | 172.24 | 6.77  | <0.001** | 176.89 | 5.34  | 169.83 | 6.79  | 0.076   | 195.95 | 11.01 | 142.14 | 106.80 | 0.005** | 202.12 | 165.63 | 36.48  |
| N-S-GN                                             | 66.79  | 11.43 | 58.63  | 4.92  | 0.032    | 78.21  | 2.05  | 64.35  | 5.25  | <0.001** | 75.32  | 4.26  | 62.56  | 4.34  | 0.005** | 67.39  | 4.08  | 63.03  | 4.95   | 0.225   | 68.81  | 62.55  | 6.26   |
| S-N-Pog                                            | 76.48  | 8.02  | 79.70  | 4.59  | 0.115    | 71.65  | 4.84  | 80.92  | 7.28  | 0.027*   | 71.34  | 1.28  | 78.61  | 4.43  | 0.005** | 78.63  | 3.54  | 82.34  | 3.39   | 0.170   | 77.71  | 77.59  | 0.11   |
| <b>linear measurements with Sella as reference</b> |        |       |        |       |          |        |       |        |       |          |        |       |        |       |         |        |       |        |        |         |        |        |        |
| S-A                                                | 46.13  | 8.24  | 57.40  | 9.03  | <0.001** | 57.45  | 7.35  | 74.96  | 11.98 | 0.003**  | 56.40  | 4.65  | 67.00  | 5.75  | 0.005** | 63.03  | 0.78  | 78.16  | 4.98   | 0.005** | 46.75  | 63.36  | -16.61 |
| S-B                                                | 55.88  | 14.18 | 69.20  | 13.70 | 0.003**  | 89.84  | 15.76 | 96.69  | 19.59 | 0.646    | 82.46  | 15.25 | 80.79  | 8.95  | 0.824   | 99.85  | 1.02  | 100.68 | 9.38   | 0.659   | 71.33  | 74.52  | -3.20  |
| S-Pog                                              | 59.09  | 14.95 | 73.99  | 15.24 | 0.003**  | 100.11 | 19.02 | 103.97 | 21.67 | 0.879    | 89.01  | 17.70 | 87.08  | 10.92 | 0.912   | 106.47 | 2.09  | 109.32 | 10.51  | 1.000   | 78.20  | 79.42  | -1.23  |
| S-GN                                               | 59.75  | 15.73 | 75.60  | 15.69 | 0.003**  | 103.23 | 19.49 | 105.31 | 20.72 | 0.959    | 90.73  | 18.67 | 89.60  | 10.90 | 0.912   | 109.57 | 3.92  | 113.12 | 11.28  | 1.000   | 80.75  | 81.51  | -0.76  |
| S-PNS                                              | 24.94  | 5.49  | 29.59  | 6.11  | 0.040    | 29.33  | 5.94  | 41.58  | 8.21  | 0.007**  | 28.36  | 2.57  | 36.16  | 3.90  | 0.002** | 39.46  | 2.94  | 42.60  | 4.59   | 0.225   | 22.88  | 34.27  | -11.39 |
| S-GO                                               | 47.10  | 12.90 | 55.18  | 10.88 | 0.010    | 73.40  | 12.52 | 77.55  | 15.98 | 0.646    | 66.57  | 13.15 | 65.30  | 7.22  | 0.738   | 82.00  | 10.60 | 82.27  | 7.83   | 1.000   | 61.34  | 61.26  | 0.08   |
| <b>linear measurements with ANS as reference</b>   |        |       |        |       |          |        |       |        |       |          |        |       |        |       |         |        |       |        |        |         |        |        |        |
| ANS-S                                              | 46.32  | 8.41  | 57.86  | 9.01  | <0.001** | 59.95  | 6.95  | 75.28  | 11.44 | 0.003**  | 59.04  | 5.64  | 67.61  | 6.03  | 0.056   | 65.93  | 1.31  | 79.30  | 5.77   | 0.005** | 48.92  | 63.84  | -14.93 |
| ANS-BA                                             | 57.32  | 9.75  | 70.34  | 8.88  | <0.001** | 72.56  | 9.05  | 87.89  | 11.29 | 0.013*   | 65.56  | 5.66  | 79.84  | 5.75  | 0.002** | 72.08  | 3.64  | 92.60  | 7.64   | 0.005** | 59.09  | 76.30  | -17.22 |
| ANS-N                                              | 26.35  | 6.33  | 29.45  | 6.23  | 0.088    | 39.63  | 5.94  | 42.29  | 7.96  | 0.494    | 35.62  | 4.12  | 35.72  | 5.37  | 0.824   | 38.88  | 0.91  | 44.80  | 6.10   | 0.170   | 29.81  | 32.64  | -2.83  |
| ANS-MEN                                            | 32.96  | 13.44 | 39.24  | 10.24 | 0.042    | 71.87  | 14.86 | 59.76  | 11.25 | 0.130    | 60.97  | 16.38 | 49.51  | 5.57  | 0.360   | 68.66  | 0.64  | 61.49  | 7.88   | 0.088   | 51.48  | 45.05  | 6.42   |
| ANS-PNS                                            | 24.52  | 6.60  | 36.18  | 5.46  | <0.001** | 42.40  | 6.20  | 47.28  | 7.46  | 0.335    | 37.05  | 5.15  | 41.41  | 4.03  | 0.250   | 31.16  | 0.50  | 51.39  | 5.30   | 0.005** | 35.20  | 39.23  | -4.03  |
| Wit's                                              | 1.93   | 12.85 | 1.98   | 2.88  | 0.047    | -8.60  | 5.72  | 3.24   | 3.31  | <0.001** | 6.90   | 7.83  | 1.85   | 3.30  | 0.301   | -10.27 | 3.15  | 1.24   | 3.88   | 0.011*  | -10.13 | 2.66   | -12.78 |
| <b>Orbit</b>                                       |        |       |        |       |          |        |       |        |       |          |        |       |        |       |         |        |       |        |        |         |        |        |        |
| <b>Unilateral orbital feature</b>                  |        |       |        |       |          |        |       |        |       |          |        |       |        |       |         |        |       |        |        |         |        |        |        |
| orbit length                                       | 29.61  | 4.63  | 36.70  | 5.54  | <0.001** | 34.28  | 4.06  | 46.26  | 5.18  | <0.001** | 35.42  | 1.47  | 42.50  | 3.06  | 0.002** | 39.95  | 0.69  | 47.51  | 2.69   | 0.005** | 30.23  | 40.56  | -10.33 |
| orbit height                                       | 29.62  | 6.89  | 27.45  | 3.94  | 0.359    | 38.36  | 2.37  | 33.07  | 2.75  | <0.001** | 34.17  | 1.71  | 31.09  | 2.08  | 0.039*  | 38.14  | 0.94  | 33.74  | 2.13   | 0.011*  | 34.77  | 29.62  | 5.15   |
| orbit width                                        | 28.00  | 6.44  | 29.28  | 3.20  | 0.371    | 37.32  | 3.00  | 34.94  | 3.43  | 0.180    | 30.83  | 0.94  | 32.54  | 1.99  | 0.130   | 37.19  | 1.75  | 36.10  | 1.54   | 0.368   | 32.23  | 31.33  | 0.90   |
| vertical cone angle                                | 61.91  | 7.67  | 54.80  | 4.06  | <0.001** | 63.78  | 9.87  | 54.00  | 2.21  | 0.018*   | 64.33  | 1.28  | 53.90  | 4.29  | 0.002** | 64.69  | 0.64  | 53.12  | 4.43   | 0.005** | 70.24  | 56.18  | 14.06  |
| Orbital Rim Angle                                  | 117.73 | 7.04  | 118.16 | 4.47  | 0.966    | 108.10 | 6.72  | 118.59 | 4.40  | 0.003**  | 113.47 | 1.60  | 116.80 | 3.17  | 0.100   | 117.52 | 2.27  | 118.39 | 3.16   | 0.769   | 101.13 | 115.40 | -14.27 |
| GPR/L                                              | 10.97  | 3.10  | 4.83   | 1.51  | <0.001** | 13.92  | 2.43  | 5.70   | 2.11  | <0.001** | 11.80  | 1.72  | 4.59   | 2.08  | 0.005** | 13.12  | 1.15  | 5.12   | 1.91   | 0.005** | 13.85  | 3.99   | 9.86   |
| visual axis length                                 | 38.23  | 5.38  | 38.87  | 4.87  | 0.765    | 47.31  | 2.78  | 47.52  | 4.71  | 1.000    | 43.34  | 3.17  | 43.38  | 2.81  | 1.000   | 50.30  | 1.44  | 47.73  | 3.47   | 0.170   | 41.37  | 41.76  | -0.39  |
| visual axis length/orbital length                  | 1.30   | 0.11  | 1.06   | 0.06  | <0.001** | 1.39   | 0.12  | 1.03   | 0.04  | <0.001** | 1.22   | 0.05  | 1.02   | 0.05  | 0.002** | 1.26   | 0.03  | 1.01   | 0.06   | 0.005** | 1.37   | 1.03   | 0.34   |
| <b>Bilateral orbital relationship</b>              |        |       |        |       |          |        |       |        |       |          |        |       |        |       |         |        |       |        |        |         |        |        |        |
| MOR-MOL                                            | 19.78  | 4.89  | 17.42  | 2.46  | 0.241    | 25.75  | 4.30  | 20.86  | 2.73  | 0.053    | 25.79  | 4.24  | 18.75  | 2.59  | 0.017*  | 28.02  | 2.21  | 22.89  | 3.39   | 0.038*  | 22.86  | 17.00  | 5.86   |
| UORL-UORR                                          | 51.93  | 13.42 | 45.63  | 5.16  | 0.286    | 65.72  | 7.09  | 52.08  | 6.95  | 0.007**  | 53.07  | 9.05  | 46.96  | 7.14  | 0.203   | 75.12  | 7.99  | 56.87  | 7.17   | 0.005** | 59.55  | 43.89  | 15.66  |
| OrL-OrR                                            | 57.39  | 11.15 | 48.46  | 5.33  | 0.002**  | 70.08  | 9.62  | 61.57  | 11.61 | 0.180    | 63.88  | 4.56  | 52.37  | 5.01  | 0.010*  | 74.06  | 1.99  | 56.90  | 13.05  | 0.005** | 64.27  | 48.81  | 15.46  |
| FZR-FZL                                            | 73.67  | 18.16 | 73.44  | 7.15  | 0.579    | 99.01  | 9.82  | 88.47  | 8.92  | 0.024*   | 86.35  | 5.71  | 80.32  | 5.75  | 0.130   | 101.56 | 6.94  | 91.90  | 6.38   | 0.126   | 87.18  | 75.63  | 11.55  |
| OFR-OFL                                            | 18.84  | 5.88  | 19.57  | 3.19  | 0.141    | 28.79  | 3.34  | 26.18  | 3.96  | 0.125    | 23.88  | 5.26  | 22.64  | 2.79  | 0.574   | 34.57  | 1.60  | 27.38  | 4.94   | 0.038*  | 26.06  | 21.01  | 5.06   |
| cornea r-cornea l                                  | 52.02  | 11.04 | 47.65  | 4.50  | 0.424    | 70.73  | 7.99  | 58.42  | 7.67  | 0.007**  | 59.69  | 7.32  | 51.75  | 4.15  | 0.100   | 72.83  | 6.00  | 60.93  | 5.60   | 0.022*  | 53.40  | 47.97  | 5.44   |
| Bilateral optical axis angle                       | 51.28  | 5.86  | 42.88  | 5.51  | <0.001** | 52.63  | 9.18  | 39.58  | 2.02  | 0.024*   | 48.98  | 4.47  | 39.26  | 2.88  | 0.005** | 44.44  | 5.12  | 41.09  | 3.45   | 0.456   | 38.28  | 37.57  | 0.71   |
| <b>Orbit malformation special measurements</b>     |        |       |        |       |          |        |       |        |       |          |        |       |        |       |         |        |       |        |        |         |        |        |        |
| angle between bilateral orbit cone                 | 1.12   | 8.87  | -3.77  | 5.60  | 0.019*   | -9.68  | 10.10 | -8.88  | 3.43  | 0.682    | 5.75   | 2.42  | -7.53  | 3.48  | 0.002** | -15.96 | 5.64  | -6.33  | 4.42   | 0.005** | 12.87  | -10.40 | 23.27  |
| roll angle of ethmoid                              | 5.98   | 3.88  | -4.42  | 4.46  | <0.001** | 3.21   | 7.78  | -1.92  | 1.82  | 0.024*   | 14.95  | 5.94  | -3.25  | 2.75  | 0.002** | 21.41  | 22.10 | -0.64  | 3.55   | 0.005** | 5.52   | -3.28  | 8.80   |
| outside horizontal angle                           | 60.98  | 4.94  | 58.36  | 4.49  | 0.077    | 67.62  | 3.53  | 56.97  | 3.43  | <0.001** | 56.42  | 4.25  | 56.40  | 3.35  | 1.000   | 67.37  | 7.49  | 55.78  | 4.01   | 0.022*  | 64.33  | 59.25  | 5.08   |
| inside horizontal angle                            | 45.84  | 12.32 | 61.67  | 6.97  | <0.001** | 51.37  | 8.13  | 57.10  | 6.05  | 0.067    | 32.83  | 12.58 | 58.38  | 5.33  | 0.002** | 21.31  | 5.04  | 58.00  | 6.85   | 0.005** | 39.67  | 59.50  | -19.83 |
| ethmoid middle width                               | 21.47  | 6.22  | 16.90  | 3.52  | 0.002**  | 30.24  | 4.28  | 24.88  | 4.66  | 0.053    | 31.59  | 5.76  | 20.46  | 2.94  | 0.002** | 45.95  | 11.50 | 26.14  | 4.54   | 0.005** | 28.35  | 18.76  | 9.59   |
| ethmoid side angle                                 | 8.19   | 6.59  | -2.13  | 3.93  | <0.001** | 10.74  | 3.67  | 3.60   | 3.68  | 0.001**  | 13.06  | 4.67  | 0.38   | 2.69  | 0.002** | 39.26  | 33.58 | 4.06   | 5.24   | 0.005** | 13.76  | 1.92   | 11.84  |
| sphenoid side angle                                | 5.69   | 7.91  | 0.99   | 3.80  | 0.003**  | 5.76   | 5.70  | -0.94  | 5.56  | 0.024*   | 8.64   | 4.13  | 1.27   | 2.83  | 0.100*  | 6.80   | 21.38 | -5.54  | 4.74   | 0.456   | 19.15  | 3.03   | 16.11  |
| inside horizontal angle%                           | 0.75   | 0.19  | 1.06   | 0.08  | <0.001** | 0.76   | 0.11  | 1.00   | 0.07  | 0.001**  | 0.57   | 0.19  | 1.04   | 0.07  | 0.002** | 0.32   | 0.10  | 1.04   | 0.06   | 0.005** | 0.62   | 1.00   | -0.38  |

|                                           |        |       |        |       |          |        |       |        |       |          |        |       |        |       |         |        |       |        |       |         |        |        |        |
|-------------------------------------------|--------|-------|--------|-------|----------|--------|-------|--------|-------|----------|--------|-------|--------|-------|---------|--------|-------|--------|-------|---------|--------|--------|--------|
| ethmoid side angle%                       | 0.14   | 0.11  | -0.04  | 0.07  | <0.001** | 0.16   | 0.05  | 0.06   | 0.07  | 0.010*   | 0.24   | 0.10  | 0.01   | 0.05  | 0.002** | 0.55   | 0.41  | 0.07   | 0.09  | 0.005** | 0.21   | 0.03   | 0.18   |
| sphenoid side angle%                      | 0.09   | 0.13  | 0.02   | 0.06  | 0.002**  | 0.09   | 0.08  | -0.02  | 0.10  | 0.053    | 0.16   | 0.08  | 0.02   | 0.05  | 0.010*  | 0.12   | 0.31  | -0.10  | 0.08  | 0.456   | 0.29   | 0.05   | 0.24   |
| <b>Zygoma</b>                             |        |       |        |       |          |        |       |        |       |          |        |       |        |       |         |        |       |        |       |         |        |        |        |
| <b>Zygomatic morphology</b>               |        |       |        |       |          |        |       |        |       |          |        |       |        |       |         |        |       |        |       |         |        |        |        |
| Zygomatic protrusion                      | 34.53  | 6.37  | 42.85  | 6.81  | <0.001** | 42.44  | 3.72  | 63.36  | 23.54 | <0.001** | 40.50  | 3.48  | 49.89  | 3.54  | 0.002** | 47.72  | 0.92  | 77.21  | 30.98 | 0.005** | 38.27  | 47.29  | -9.02  |
| ZPR-S-ZPL                                 | 90.94  | 5.66  | 69.91  | 7.71  | <0.001** | 96.18  | 5.50  | 84.81  | 9.52  | 0.013*   | 90.12  | 2.58  | 77.22  | 6.30  | 0.002** | 91.59  | 3.32  | 85.09  | 2.82  | 0.011*  | 88.08  | 73.26  | 14.82  |
| ZPR-ZPL                                   | 69.68  | 13.20 | 84.72  | 6.09  | <0.001** | 92.09  | 10.33 | 83.34  | 8.76  | 0.151    | 80.07  | 3.68  | 80.75  | 4.79  | 0.912   | 93.20  | 5.89  | 87.12  | 10.58 | 0.456   | 77.85  | 81.27  | -3.42  |
| ZPR/L-S                                   | 49.84  | 8.76  | 52.17  | 7.13  | 0.306    | 61.92  | 6.33  | 66.17  | 8.91  | 0.494    | 56.63  | 3.75  | 59.69  | 4.58  | 0.426   | 64.98  | 2.37  | 68.11  | 3.94  | 0.291   | 56.04  | 56.31  | -0.27  |
| Zygoma transverse width                   | 7.43   | 1.19  | 5.57   | 1.15  | <0.001** | 6.71   | 0.79  | 6.42   | 1.57  | 0.437    | 4.97   | 0.41  | 5.49   | 0.58  | 0.130   | 6.34   | 0.85  | 6.18   | 1.05  | 1.000   | 7.76   | 5.21   | 2.54   |
| Zygoma height                             | 26.99  | 7.12  | 27.80  | 5.82  | 0.609    | 39.10  | 4.24  | 38.79  | 6.89  | 0.820    | 37.63  | 3.12  | 33.50  | 3.39  | 0.076   | 40.69  | 0.92  | 39.88  | 3.58  | 0.769   | 33.91  | 31.75  | 2.15   |
| Zygoma length                             | 28.60  | 7.35  | 35.36  | 5.45  | 0.001    | 38.41  | 3.66  | 44.84  | 6.41  | 0.024*   | 35.54  | 5.42  | 41.15  | 3.26  | 0.076   | 47.24  | 0.58  | 46.92  | 4.63  | 0.769   | 33.08  | 39.96  | -6.88  |
| Zygoma superior curvature length          | 25.97  | 5.72  | 25.95  | 3.04  | 0.741    | 33.08  | 1.70  | 30.68  | 3.23  | 0.083    | 28.92  | 1.02  | 29.34  | 1.39  | 0.654   | 34.44  | 1.41  | 32.21  | 2.31  | 0.170   | 28.95  | 27.51  | 1.44   |
| bizygomatic width                         | 75.46  | 16.23 | 85.04  | 12.09 | 0.021    | 110.64 | 15.24 | 110.34 | 13.96 | 1.000    | 95.63  | 9.13  | 98.29  | 7.86  | 0.654   | 111.80 | 9.19  | 112.62 | 5.59  | 0.368   | 93.39  | 93.15  | 0.23   |
| <b>Midface</b>                            |        |       |        |       |          |        |       |        |       |          |        |       |        |       |         |        |       |        |       |         |        |        |        |
| ANS-PP                                    | 33.23  | 7.26  | 44.19  | 5.99  | <0.001** | 46.85  | 5.44  | 55.77  | 7.31  | 0.018*   | 43.23  | 3.71  | 50.33  | 4.57  | 0.027*  | 47.59  | 1.90  | 60.15  | 4.42  | 0.005   | 38.56  | 48.50  | -9.94  |
| ZMR-ZML                                   | 38.09  | 9.37  | 37.84  | 5.19  | 0.624    | 49.83  | 10.32 | 47.36  | 6.85  | 0.820    | 50.51  | 1.91  | 41.31  | 5.71  | 0.010*  | 52.06  | 5.12  | 48.67  | 6.82  | 0.769   | 43.10  | 37.07  | 6.03   |
| JR-JL                                     | 43.83  | 7.85  | 48.13  | 4.96  | 0.035    | 57.53  | 5.48  | 59.32  | 6.92  | 0.616    | 47.87  | 4.95  | 54.14  | 3.77  | 0.039*  | 64.03  | 4.90  | 62.11  | 7.90  | 0.769   | 44.83  | 52.91  | -8.08  |
| NcR-NcL                                   | 15.90  | 4.02  | 19.95  | 2.82  | 0.001**  | 23.48  | 4.96  | 22.56  | 2.11  | 0.494    | 20.39  | 2.90  | 22.24  | 2.25  | 0.574   | 22.43  | 2.61  | 23.85  | 2.19  | 0.456   | 18.30  | 20.68  | -2.38  |
| N-Ro                                      | 12.18  | 3.22  | 12.50  | 3.27  | 0.782    | 18.15  | 2.70  | 19.33  | 4.63  | 0.616    | 17.35  | 3.70  | 15.40  | 3.04  | 0.426   | 18.70  | 2.98  | 19.18  | 4.94  | 1.000   | 14.31  | 14.06  | 0.24   |
| Ro-ANS                                    | 15.36  | 3.79  | 19.16  | 7.90  | 0.105    | 24.23  | 5.21  | 25.11  | 5.92  | 1.000    | 21.20  | 1.02  | 21.41  | 3.50  | 1.000   | 23.73  | 1.12  | 27.93  | 3.22  | 0.038*  | 17.51  | 19.68  | -2.17  |
| <b>Mandible</b>                           |        |       |        |       |          |        |       |        |       |          |        |       |        |       |         |        |       |        |       |         |        |        |        |
| <b>Mandibular morphology</b>              |        |       |        |       |          |        |       |        |       |          |        |       |        |       |         |        |       |        |       |         |        |        |        |
| <b>Linear measurements</b>                |        |       |        |       |          |        |       |        |       |          |        |       |        |       |         |        |       |        |       |         |        |        |        |
| COR-COL                                   | 56.48  | 11.40 | 67.63  | 9.28  | 0.002**  | 78.37  | 7.57  | 86.32  | 10.07 | 0.102    | 68.08  | 6.86  | 77.37  | 9.04  | 0.164   | 84.26  | 1.19  | 87.60  | 7.39  | 0.368   | 68.17  | 72.72  | -4.56  |
| GOR-GOL                                   | 51.20  | 11.54 | 62.47  | 9.02  | 0.001**  | 79.34  | 11.78 | 82.48  | 13.05 | 0.574    | 66.07  | 9.02  | 71.52  | 7.15  | 0.301   | 90.72  | 12.58 | 84.49  | 6.50  | 0.456   | 66.44  | 66.92  | -0.48  |
| COR/L-GOR/L                               | 22.99  | 10.33 | 31.39  | 10.75 | 0.004**  | 48.06  | 9.77  | 49.71  | 14.48 | 0.879    | 38.89  | 10.31 | 37.22  | 5.90  | 0.738   | 49.27  | 7.39  | 50.08  | 6.33  | 0.885   | 37.10  | 33.62  | 3.48   |
| GOR/L-Pog                                 | 42.35  | 8.79  | 54.08  | 9.24  | <0.001** | 68.37  | 13.59 | 75.38  | 15.67 | 0.328    | 55.18  | 8.25  | 62.31  | 7.29  | 0.301   | 72.99  | 4.74  | 77.94  | 8.35  | 0.291   | 52.97  | 56.83  | -3.86  |
| COR/L-Pog                                 | 56.26  | 13.32 | 75.25  | 13.85 | <0.001** | 99.44  | 19.31 | 105.96 | 22.22 | 0.574    | 82.71  | 14.39 | 87.84  | 10.58 | 0.738   | 102.37 | 2.13  | 110.08 | 11.67 | 0.555   | 77.94  | 80.28  | -2.33  |
| CO-GO/GO-Pog                              | 0.49   | 0.09  | 0.59   | 0.16  | 0.013    | 0.70   | 0.04  | 0.65   | 0.07  | 0.130    | 0.70   | 0.09  | 0.60   | 0.04  | 0.164   | 0.67   | 0.06  | 0.64   | 0.04  | 0.456   | 0.71   | 0.59   | 0.11   |
| <b>Angular measurements</b>               |        |       |        |       |          |        |       |        |       |          |        |       |        |       |         |        |       |        |       |         |        |        |        |
| COR/L-GOR/L-Men                           | 127.86 | 5.83  | 124.71 | 15.88 | 0.763    | 123.33 | 4.34  | 117.73 | 15.35 | 0.442    | 128.79 | 3.56  | 120.34 | 20.12 | 0.738   | 120.56 | 12.47 | 119.07 | 14.45 | 0.555   | 100.17 | 99.37  | 0.80   |
| ARR/L-GOR/L-Men                           | 129.95 | 14.76 | 132.26 | 4.66  | 0.684    | 126.80 | 4.40  | 124.35 | 4.52  | 0.442    | 131.51 | 3.73  | 129.43 | 2.79  | 0.498   | 123.32 | 9.41  | 120.59 | 15.13 | 0.555   | 129.81 | 128.43 | 1.38   |
| ARR/L-GOR/L-N                             | 71.99  | 12.80 | 76.89  | 9.16  | 0.354    | 52.02  | 5.69  | 60.74  | 7.08  | 0.037*   | 58.27  | 12.03 | 68.67  | 5.15  | 0.203   | 56.44  | 3.37  | 60.23  | 5.13  | 0.225   | 62.14  | 70.58  | -8.43  |
| N-GOR/L-Men                               | 62.88  | 6.38  | 60.09  | 5.47  | 0.439    | 78.20  | 1.61  | 65.78  | 2.73  | <0.001** | 77.83  | 6.32  | 64.12  | 2.41  | 0.002** | 71.05  | 6.28  | 65.91  | 3.33  | 0.225   | 72.93  | 62.28  | 10.66  |
| [CoR-AGR-Men]-[CoL-AGL-Men]               | 126.77 | 12.98 | 121.38 | 14.71 | 0.194    | 112.84 | 14.22 | 101.51 | 15.25 | 0.104    | 145.22 | 16.89 | 114.59 | 12.84 | 0.017*  | 122.36 | 1.83  | 100.51 | 8.69  | 0.005** | 139.83 | 118.23 | 21.60  |
| <b>Mandibular positional relationship</b> |        |       |        |       |          |        |       |        |       |          |        |       |        |       |         |        |       |        |       |         |        |        |        |
| COR/L-A                                   | 51.17  | 9.88  | 68.37  | 9.86  | <0.001** | 69.18  | 8.62  | 88.13  | 13.07 | 0.007**  | 64.51  | 3.85  | 77.94  | 6.97  | 0.002** | 73.37  | 2.29  | 91.99  | 7.93  | 0.005** | 57.78  | 72.98  | -15.20 |
| J-[Z-AG] R/L                              | 9.67   | 3.67  | 11.71  | 3.05  | 0.039    | 15.24  | 4.30  | 16.04  | 3.73  | 1.000    | 14.41  | 2.20  | 13.37  | 3.06  | 0.738   | 14.70  | 1.08  | 16.60  | 1.75  | 0.088   | 14.06  | 10.94  | 3.12   |
| Pog-NB                                    | 0.64   | 2.62  | 0.89   | 1.40  | 0.512    | -0.62  | 3.31  | 0.48   | 1.98  | 0.646    | 4.01   | 2.45  | 1.24   | 0.88  | 0.027*  | 0.62   | 1.92  | 0.61   | 1.67  | 0.885   | 4.34   | 1.40   | 2.95   |
| Pog-N-B                                   | 0.29   | 2.23  | 0.26   | 1.55  | 0.865    | -0.59  | 1.98  | -0.77  | 1.14  | 0.721    | 2.62   | 1.39  | 0.24   | 1.39  | 0.017*  | 0.42   | 1.13  | 0.31   | 1.03  | 1.000   | 3.63   | 1.22   | 2.41   |
| BA-S-GN                                   | 68.51  | 10.42 | 72.49  | 7.42  | 0.145    | 62.97  | 9.51  | 64.37  | 5.26  | 1.000    | 48.41  | 6.59  | 65.55  | 3.60  | 0.002** | 50.93  | 1.01  | 66.06  | 5.13  | 0.005** | 58.94  | 65.42  | -6.48  |

\*p<0.05

\*\*p<0.01
