# Supplementary figures and images for: Classification of Subtypes of Apert Syndrome, Based on the Type of Vault Suture Synostosis
Source: PubMed Central journal article supplement — Plast Reconstr Surg Glob Open. 2019 Mar 20;7(3):e2158. doi: 10.1097/GOX.0000000000002158 (PMC6467634; doi:10.1097/gox.0000000000002158), 2019-03-20

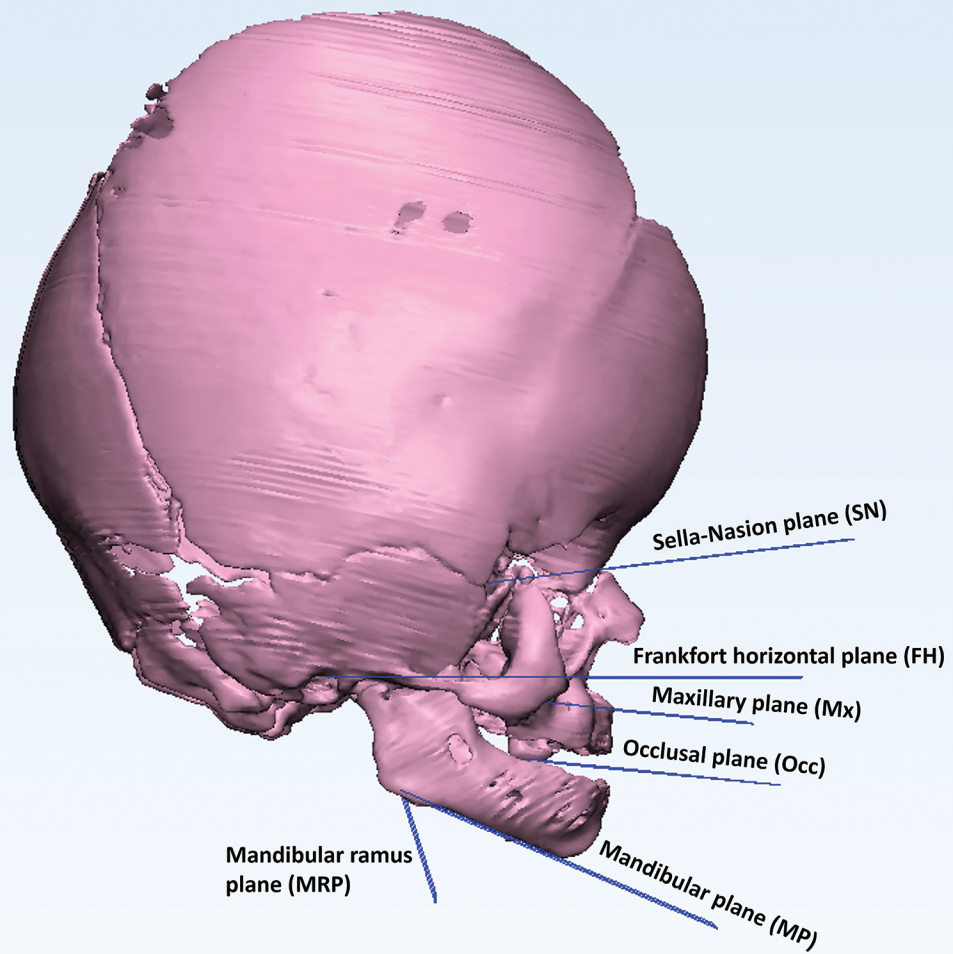

Supplement: gox-7-e2158-s003.pdf [file gox-7-e2158-s003.pdf]
